# Supplementary material for: Characterization of Ocean Mixing and Dynamics during the2017 Maud Rise Polynya Event
Source: Copernicus journal article supplement (doi:10.5194/os-2019-41), 2019-05-23
Supplement: Supplementary file 1 [file os-2019-41-supplement.pdf]

## Supplementary material

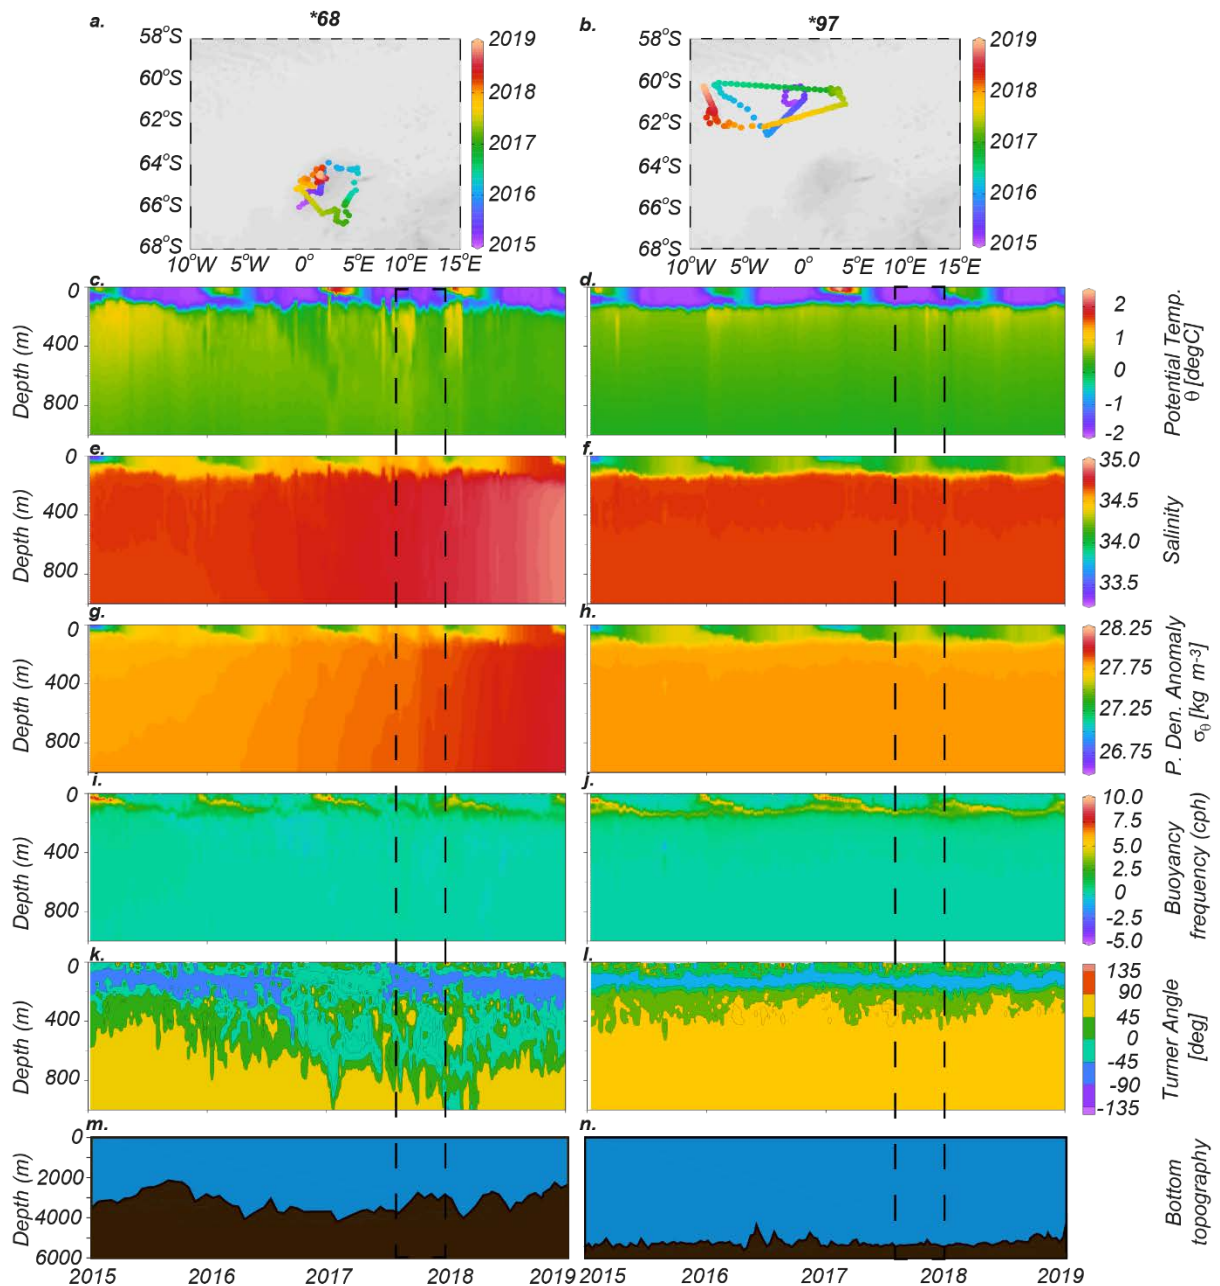

**Figure S1.** From top to bottom: Float location (a, b). Potential temperature ( $T$  in  $^{\circ}\text{C}$ ) (c, d). Salinity ( $S$ ) (e,f). Potential density anomaly ( $\sigma_{\theta} = \rho_{\theta} - 1000 \text{ kg m}^{-3}$ ) (g, h). Buoyancy frequency ( $N$  in cycles per hour) (i, j). Turner angle ( $T_U$  in rotation degrees) (k, l). And bathymetry sections (meters) (m, n) for the data time series of the SOCCOM \*68, and \*97, for the MRR and NMR, respectively. The data cover from January 2015 – January 2019 and profiles depth from 0 to 1000 m. (Dashed line) Marks the period of the 2017 Polynya event.

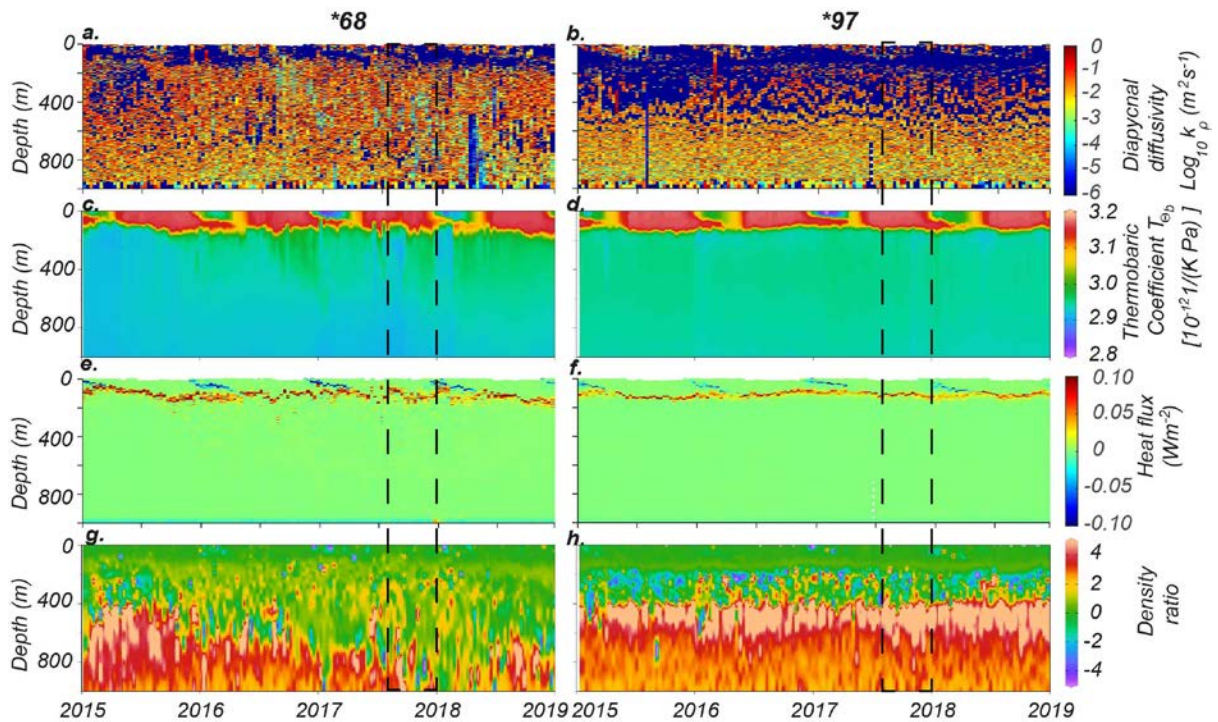

**Figure S2.** From top to bottom: Diapycnal diffusivity ( $k_\rho$ ), thermobaric coefficients, heat flux ( $F_H$  in  $\text{W m}^{-2}$ ), and density ratio ( $R_\rho$  in m), of the SOCCOM \*68 (a, c, e, g), and \*97 (b, d, f, h), representative for the NMR and MRR, respectively. The data span January 2015 – January 2019 and the profile depths are shown from 0 to 300 m. (Dashed line) Marks the period of the 2017 Polynya event.
